# Supplementary material for: Anti-seizure gene therapy for focal cortical dysplasia
Source: PubMed Central journal article supplement (PMC10834237; doi:10.1093/brain/awad387), 2023-12-15
Supplement: awad387_supplementary_data.pdf [file awad387_supplementary_data.pdf]

## Supplementary figures

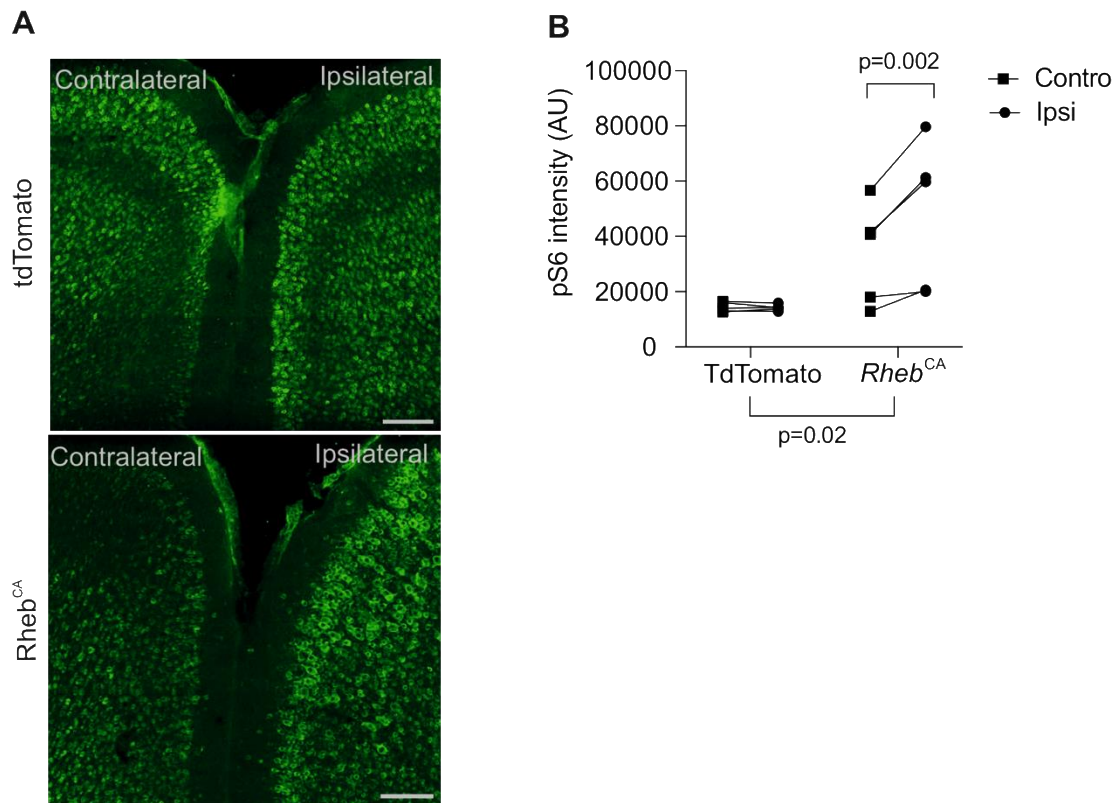

**Fig.S1. *Rheb*<sup>CA</sup> mice shows higher pS6 fluorescence intensity in the electroporated (ipsilateral) hemisphere compared to tdTomato (control).** **A.** Representative images of pS6 fluorescence in tdTomato or tdTomato-*RHEB*<sup>CA</sup> mice. **B.** Slope graph of pS6 intensity for tdTomato or tdTomato-*RHEB*<sup>CA</sup> mice (n=5 mice, 2-4 slices per mouse, 2-way ANOVA followed by Bonferroni multiple comparison test).

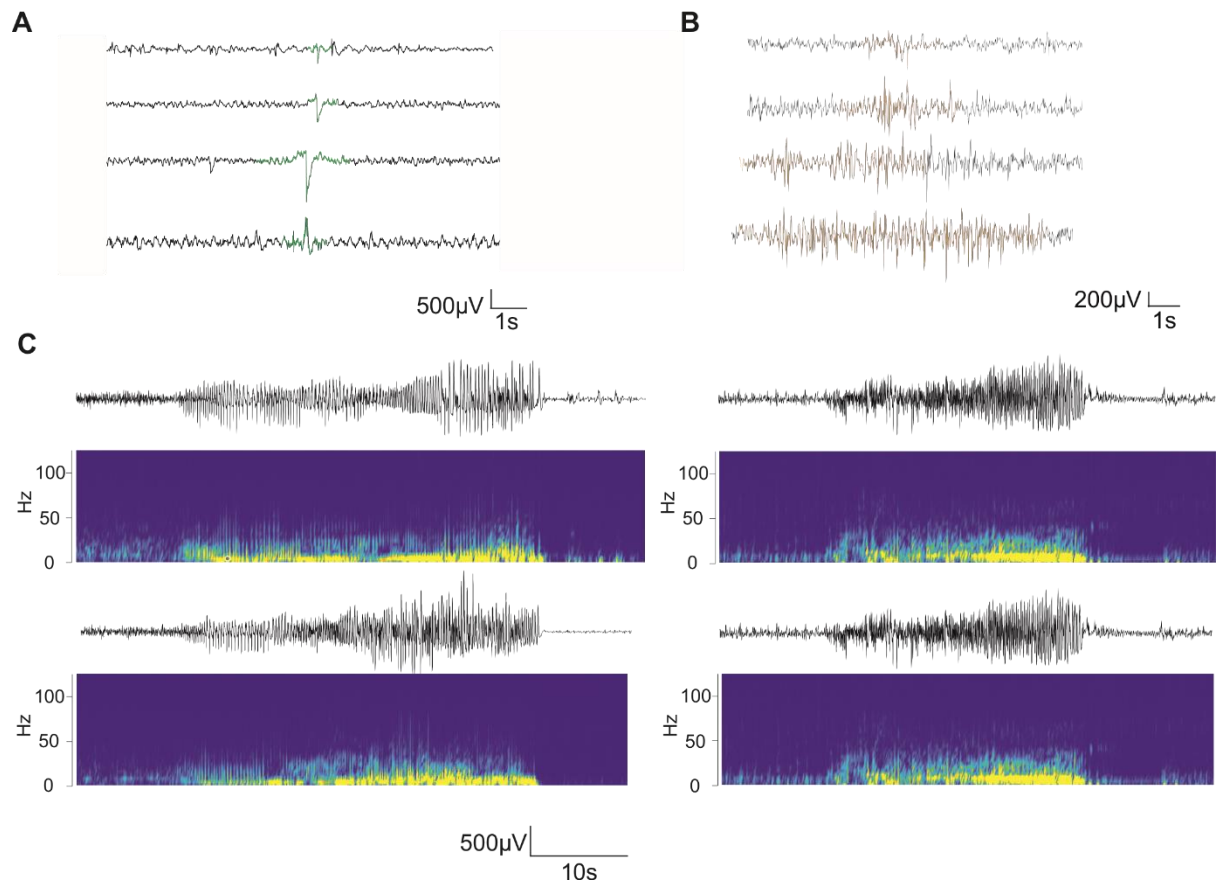

**Fig.S2. Representative epileptiform activity in mice electroporated with *RHEB<sup>CA</sup>* . A.** Interictal spikes not present in mice electroporated with control tdTomato. **B.** Examples of polyspikes. **C.** Examples of generalised seizures with spectrograms, associated with tonic-clonic convulsions.

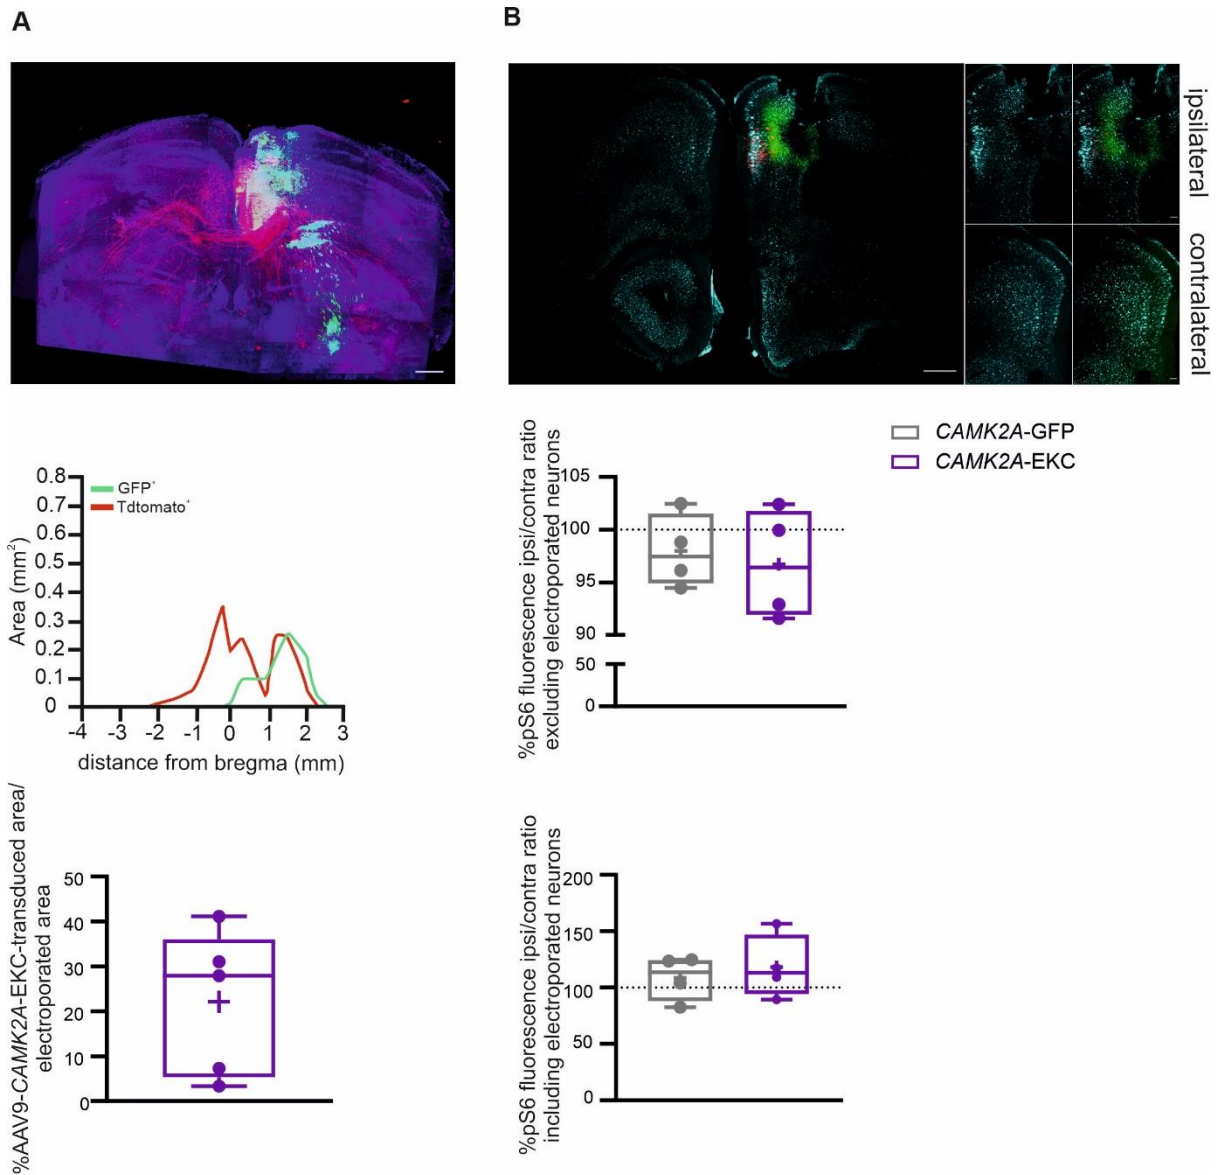

**Fig. S3. *CAMK2A-EKC* therapy spreads in the dysplastic region and does not reduce mTORC1 activity** **A.** 3D reconstruction of the spread of the dysplastic area (tdTomato, red fluorescence) and its overlap with expression of the GFP reporter included in the *CAMK2A-EKC* therapy, scale bar=500 $\mu$ m. (*middle*) Line graph displaying the anatomical overlap of the transduced (GFP<sup>+</sup>) and electroporated (tdTomato<sup>+</sup>) areas. (*bottom*) Box plot showing the percentage of electroporated area (tdTomato) overlapping with *CAMK2A-EKC* transduced area (GFP<sup>+</sup>) (n=5 *CAMK2A-EKC-GFP* mice). **B.** Immunofluorescence pictures of prefrontal cortical slice presenting a cortical dysplastic area (left panel: Two frontal hemispheres labelled with GFP (EKC) and pS6 antibody (cyan), scale bar=500 $\mu$ m; middle panels: Zoom in the ipsilateral hemisphere (top) and contralateral hemisphere (bottom) showing the pS6 expression (cyan); right panels: ipsilateral hemisphere (top) and contralateral hemisphere (bottom), scale bar=100 $\mu$ m). (*right*) Box plots displaying the % of pS6 fluorescence between the two hemispheres (ipsi = electroporated hemisphere) in animals from both groups (grey = *CAMK2A-GFP*, purple = *CAMK2A-EKC*, n=4 mice per group). Data are plotted as box and whiskers, representing interquartile range (box), median (horizontal line), mean (+ symbol) and maximum and minimum (whiskers), together with all the points.

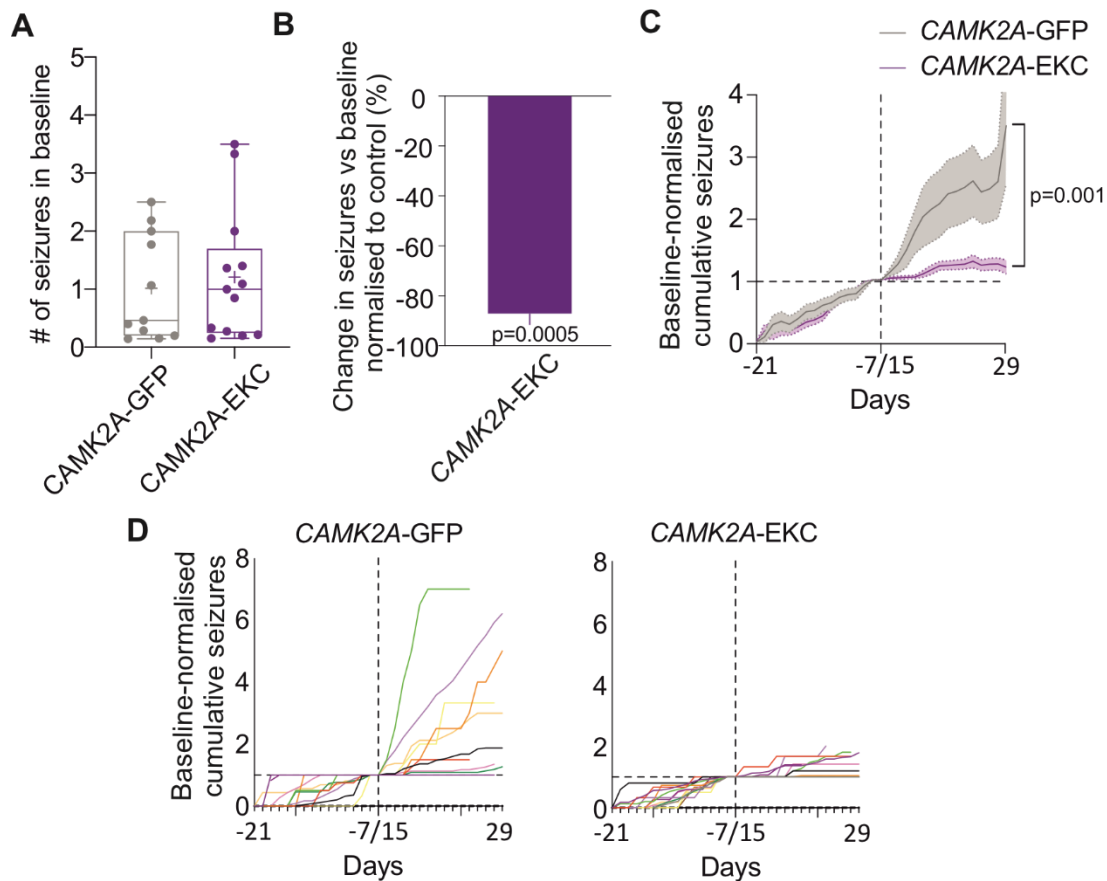

**Fig.S4. CAMK2A-EKC and CAMK2A-GFP treated animals had similar baseline seizure frequencies.** **A.** Box plot displaying the average seizure frequency recorded prior to AAV injection with either CAMK2A-EKC (n=13 mice) or CAMK2A-GFP (n=11 mice) (p=0.65, unpaired t-test). Data are plotted as box and whiskers, representing interquartile range (box), median (horizontal line), mean (+ symbol) and maximum and minimum (whiskers), together with all the points. **B.** Graph displaying the change in number of seizures in animals treated with CAMK2A-EKC normalised to the average change in CAMK2A-GFP treated animals. **C.** Cumulative seizures normalised to baseline (CAMK2A-GFP n=11 mice, CAMK2A-EKC n=13 mice, Mixed effects analysis followed by Sidak's multiple comparison test). **D.** Cumulative seizures normalised to baseline for each animal; left: CAMK2A-GFP, right: CAMK2A-EKC

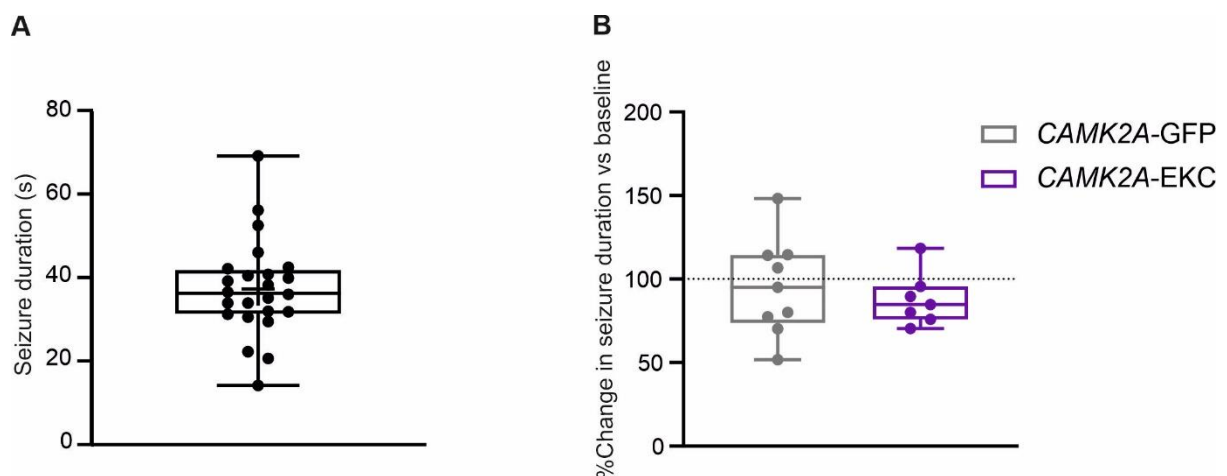

**Fig. S5. CAMK2A-EKC therapy does not change seizure duration** **A.** Box plot displaying the average durations of seizures recorded prior to AAV injection (n=24 mice). **B.** Box plot displaying the change in seizure duration normalised to baseline for CAMK2A-EKC (n=7 mice) and CAMK2A-GFP (n=9 mice) groups (p=0.5455, unpaired t-test). Data are plotted as box and whiskers, representing interquartile range (box), median (horizontal line), mean (+ symbol) and maximum and minimum (whiskers), together with all the points.

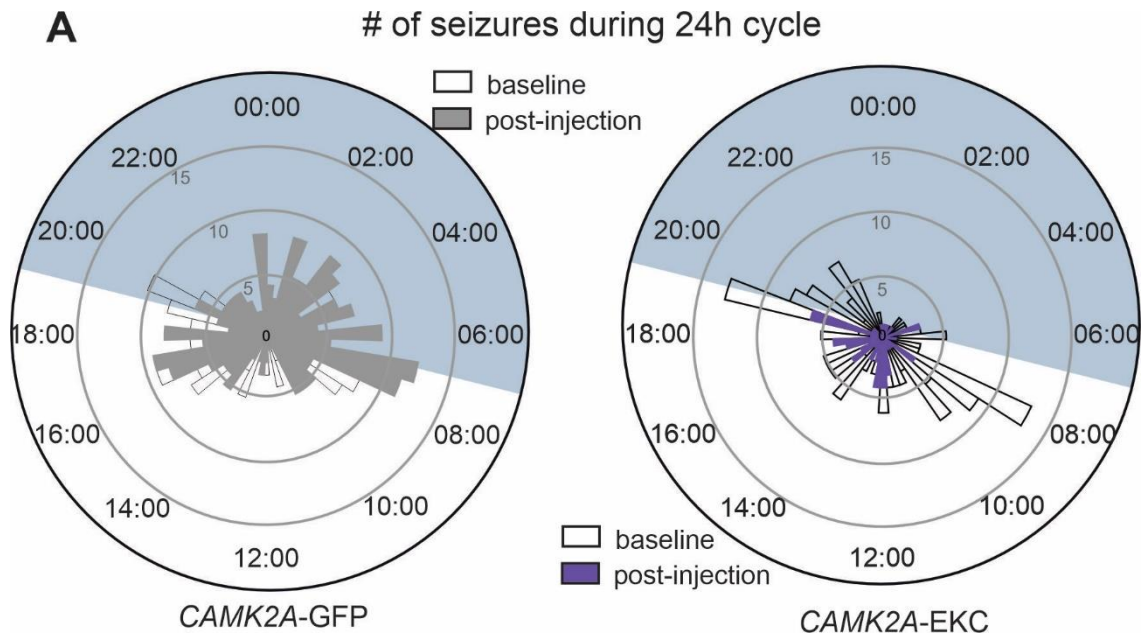

**Fig. S6. *CAMK2A-EKC* therapy does not change the light-dark cycle pattern of seizure occurrence.** Circular graph displaying the number of seizures before (empty rectangles) and after the therapy (filled rectangles) over 24h cycles for animals injected with either *CAMK2A-GFP* (n=11 mice) or *CAMK2A-EKC* (n=13 mice).

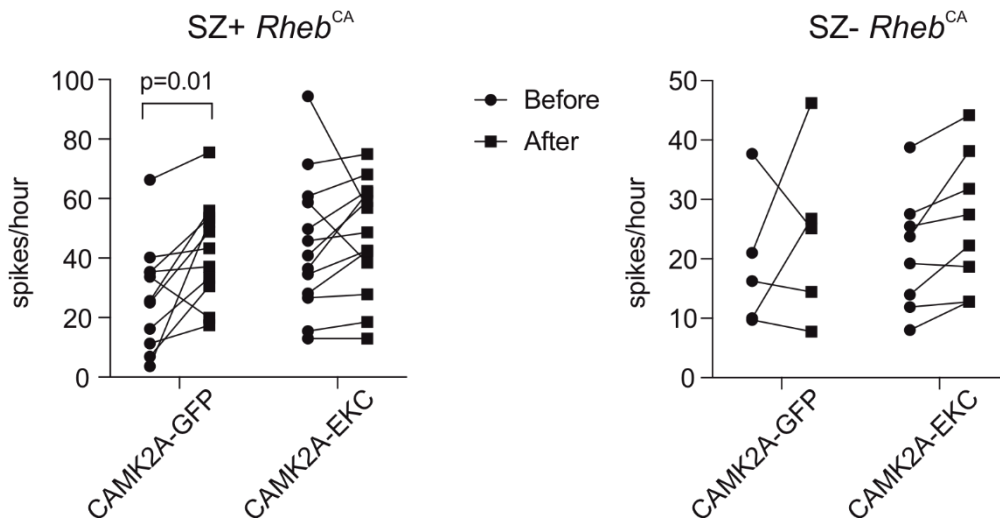

**Fig.S7. *CAMK2A-EKC* therapy prevented an increase in interictal spike frequency in *RHEB*<sup>CA</sup> animals with seizures.** Slope graphs displaying spikes per hour in SZ+ *RHEB*<sup>CA</sup> animals before and after treatment (*CAMK2A-GFP* n =11 mice, *CAMK2A-EKC* n =13 mice, 2-way ANOVA followed by Bonferroni multiple comparison test) and in SZ- *RHEB*<sup>CA</sup> animals (*CAMK2A-GFP* n =5 mice, *CAMK2A-EKC*, n =8 mice).
